# Supplementary material for: Unlocking the Bottleneck in Forward Genetics Using Whole-Genome Sequencing and Identity by Descent to Isolate Causative Mutations
Source: PubMed Central journal article supplement (PMC3561070; doi:10.1371/journal.pgen.1003219), 2013-01-31
Supplement: pgen.1003219.s005.pdf [file pgen.1003219.s005.pdf]

| Chr | Pos       | Gene      | Ref | Sub | AA sub       | Exon   | Sanger | Polyphen (Humanvar) | genotypes 1 2 3 | type     |
|-----|-----------|-----------|-----|-----|--------------|--------|--------|---------------------|-----------------|----------|
| 2   | 120317562 | Capn3     | C   | T   | T341M        | exon9  | TP     | 0.996/ prob         | 0/1 0/1 0/1     | nonsynon |
| 2   | 148509797 | Gzf1      | G   | A   | A71T         | exon3  | TP     | 0.009/benign        | 0/1 0/1 0/1     | nonsynon |
| 2   | 148697743 | Cst3      | A   | G   | W126R        | exon3  | TP     | 0.564/ poss         | 0/1 0/1 0/1     | nonsynon |
| 2   | 164482725 | Wfdc10    | T   | A   | M85K         | exon2  | TP     | 0/ benign           | 1/0 1/0 1/0     | nonsynon |
| 3   | 53343180  | Frem21    | A   | T   | V76D         | exon3  | TP     | 0.621/poss          | 1/0 1/0 1/0     | nonsynon |
| 4   | 98104052  | Inadl     | A   | C   | E478D        | exon12 | TP     | 0.074/ benign       | 1/0 1/0 1/0     | nonsynon |
| 5   | 21545383  | Reln      | C   | A   | G805V        | exon19 | TP     | 0.995/ prob         | 1/0 1/1 1/1     | nonsynon |
| 5   | 31566037  | ift172    | C   | A   | M1006I       | exon28 | TP     | 0.984/prob          | 0/1 0/1 0/1     | nonsynon |
| 5   | 134692920 | Gtf2ird2  | T   | C   | F717L        | exon16 | TP     | 0.955/prob          | 1/0 1/0 1/0     | nonsynon |
| 6   | 36473946  | Chrm2     | A   | G   | N246S        | exon1  | TP     | 0.01/ benign        | 0/1 0/1 0/1     | nonsynon |
| 6   | 70093854  | Igkv8-28  | A   | T   | V13E         | exon1  | TP     | 0.465/poss          | 0/1 0/1 0/1     | nonsynon |
| 6   | 126924519 | D6Wsu163e | A   | G   | M505V        | exon13 | TP     | 0.539/poss          | 0/1 0/1 0/1     | nonsynon |
| 9   | 21861790  | Zfp653    | T   | C   | M466V        | exon6  | TP     | 0.788/poss          | 1/0 1/0 1/0     | nonsynon |
| 9   | 25411078  | Eepd1     | G   | A   | C532Y        | exon8  | TP     | 0.991/prob          | 1/0 1/0 1/0     | nonsynon |
| 11  | 50021016  | Sqstm1    | A   | G   | C142R        | exon3  | TP     | 0.809/prob          | 1/1 0/1 0/1     | nonsynon |
| 11  | 82883777  | Slfn2     | T   | C   | V360A        | exon2  | TP     | 0.44/benign         | 0/1 0/1 0/1     | nonsynon |
| 11  | 95246346  | Slc35b1   | T   | C   | V8A          | exon1  | TP     | 0.003/benign        | 0/1 0/1 0/1     | nonsynon |
| 12  | 25742570  | Kidins220 | A   | G   | N1688S       | exon34 | TP     | 0.967/prob          | 1/0 1/0 1/0     | nonsynon |
| 12  | 31571934  | Fam150b   | A   | G   | M94V         | exon2  | TP     | 0.137/benign        | 0/1 0/1 0/1     | nonsynon |
| 12  | 71317593  | Pygl      | T   | A   | Y71F         | exon4  | TP     | 0.998/prob          | 1/0 1/0 1/0     | nonsynon |
| 12  | 77688461  | Spnb1     | A   | T   | F533L        | exon16 | TP     | 0.001/benign        | 0/1 0/1 0/1     | nonsynon |
| 13  | 84544914  | Gm17618   | A   | G   | Y21C         | exon1  | TP     | unknown             | 1/11/0 1/0      | nonsynon |
| 13  | 114000186 | Esm1      | A   | G   | T46A         | exon1  | TP     | 0.587/poss          | 1/1 0/1 1/1     | nonsynon |
| 14  | 35542591  | Wapal     | A   | G   | T799A        | exon9  | TP     | 0.811/poss          | 0/1 0/1 0/1     | nonsynon |
| 16  | 49759470  | Ift57     | T   | A   | W169R        | exon5  | TP     | 0.473/benign        | 0/1 0/1 0/1     | nonsynon |
| 8   | 123272248 | Irf8      | T   | C   | 601 + 2T > C | exon6  | TP     |                     | 0/1 0/1 0/1     | splicing |
| 4   | 3710143   | Lyn       | A   | G   | T410A        | exon12 | TP     | 0.942/prob          | 1/1 1/1 1/1     | nonsynon |
| 4   | 66590107  | Tlr4      | A   | G   | T146A        | exon4  | TP     | unknown             | 1/1 1/1 1/1     | nonsynon |
