# Supplementary material for: Unlocking the Bottleneck in Forward Genetics Using Whole-Genome Sequencing and Identity by Descent to Isolate Causative Mutations
Source: PubMed Central journal article supplement (PMC3561070; doi:10.1371/journal.pgen.1003219), 2013-01-31
Supplement: pgen.1003219.s006.pdf [file pgen.1003219.s006.pdf]

| Chr | Pos       | Gene   | Ref | Sub | AA sub | Exon  | genotypes 1 2 3 |     |     | type          |
|-----|-----------|--------|-----|-----|--------|-------|-----------------|-----|-----|---------------|
| 2   | 85240307  | Olf992 | T   | C   | N128D  | exon1 | 0/0             | 0/1 | 0/0 | nonsynonymous |
| 2   | 155580104 | Procr  | G   | A   | A152T  | exon3 | 1/0             | 1/0 | 0/0 | nonsynonymous |
| 9   | 40800682  | Crtam  | A   | T   | S101R  | exon3 | 0/1             | 0/0 | 0/1 | nonsynonymous |
| 16  | 87366449  | N6amt1 | G   | T   | R154S  | exon5 | 0/1             | 0/0 | 0/1 | nonsynonymous |
