# Supplementary material for: Unlocking the Bottleneck in Forward Genetics Using Whole-Genome Sequencing and Identity by Descent to Isolate Causative Mutations
Source: PubMed Central journal article supplement (PMC3561070; doi:10.1371/journal.pgen.1003219), 2013-01-31
Supplement: pgen.1003219.s007.pdf [file pgen.1003219.s007.pdf]

| Gene      | Internal               |                        | External                       |                             |
|-----------|------------------------|------------------------|--------------------------------|-----------------------------|
|           | Forward                | Reverse                | Forward                        | Reverse                     |
| Capn3     | TCCTCTCTCAAACCTCTCAGGA | TCTGAAGCTTATCGGACTCCA  | TTCTCAGCCGTGTGTGAGTG           | TGGTTTACAGACACGGTCCA        |
| Gzfl      | GCTGGAGTCTGTCTCTTTGG   | CCCATTCGCCAGTCTCTCTA   | AGAAAGACCCGTGTGCAGCAG          | TTGGATGGTGTCTTCTGGTGA       |
| Cs43      | TAGCCCTTAGGCATTTTTTG   | ATCATCCGGAGTGGGTATT    | AGAGCCGGAGCACCCCTTC            | GGGAGAAAGGTTTTAGCTTCC       |
| Wfdc10    | CAAGCAATAACATCTGCTGCT  | TAGTCAGAGGGAGGGGTGAC   | ATTGTGAAGCCCAACCAAGAC          | GGACCCACTCTCTGGGTAGA        |
| Frem21    | GGTAGCCAGACACAGGTCCA   | TTGTTTCTAGGAAACCAAGG   | AAAGAAATGTCTATAATTTCCCATATA    | GGATTTTCCAGTCAATTTTTCTGA    |
| Inadl     | CCACCCCAACAGGACTA      | CTGGTTTTCGGGGATCCTG    | AGTGAAGTCAGCCCATTTGG           | TCCTCTGTCTCCACACTCAA        |
| Reln      | TTACGGAAATCACTGCTGCTG  | GGGAGCAAGTCTGTGCTGA    | GGCCCTCCATGTACTGTAA            | TCCGTGTAGGTTTTCTTCAGTTT     |
| ift172    | AGGGAAATCATGTCTGTATAC  | AGGTGAGTCTCCGGGGAAAG   | GTGTGTCCGTGAGGAGGTCTG          | GAAAGTCCGAGAGGCTGAG         |
| Gt42ird2  | TGGCAGCCTACTGTACCACA   | GGTCTCATGTCCACTAGGA    | TGGTAGACTGGGTGAACCTGG          | GGGAGGCATCCAGTGTATTG        |
| Chrm2     | TGCAAGGAAGAATGTAAAGC   | CTGAACGCAGTTTTTCAGTCC  | ACCCGGTGTCTCCGAGTCTA           | TCTTTTCTCTCCCCCTGAAC        |
| Igkv8-28  | TGGTACCAGGCCAAAGTAGTTC | TGATGACACAGTCTCCATCCTC | GCCCCGTAGATCAACAGTTT           | AGGTACTGTGGGGACATTG         |
| D6Wsu163e |                        |                        | TTTGGTATGGAAGGCCAGAG           | GTTTGGACTGGGATCTGCTC        |
| Zfp653    | CAGCTGGACCCAAACAACAG   | ACAGGCCCTTCTCTCCAG     | CCACTGACACCTGTGTAGAGC          | TTATAGCCCACTGGGACTG         |
| Eepd1     | GCTCACAAACCCCTTGGATTC  | GCTCCAGTCCCTTTTCCATGT  | CACTGGGCTGTGTGAGAGA            | TTCTTGGGACTTCCCTTCTT        |
| Sqstm1    | AAAGGGTTGGGAAAGATGA    | CACCCCAATGTGATCTGTGA   | CCCGGCTCAATCAGAGA              | TCCCTGCAGAGAAGAGGAG         |
| Slfm2     | GCGCTCAGAGTGGAGAGATT   | ACCCATTCTCTGTGTAAAC    | TCATCGAAGTGCACAAATCC           | GGGCATTCATCTGGAGTTTC        |
| Slc35b1   | CGGTACCGCTACCTGCTCT    | CCTGCAGGATCCCATAGTAGA  | GTCCGACGGAGCTCCTAT             | CCTCAAGGGTCTGCTCACAT        |
| Kidins220 | CACCAACAGAGCCAATCAGA   | GCTATCTGAGGAGGCTGCAT   | CCCAGCACTGTGACTGTAA            | GGATTTTCCAGTCAATTTTTCTGA    |
| Fam150b   | CGATTTCTCACCCCTCGTAG   | GGACCTGGAACACAGAGGAA   | GTTCTCTGTTTTATCCAGTGC          | AAGTGTCTGCTGCACCTCG         |
| Pygl      | AATGCCAGCGAAATCAGTG    | GCTTCCATGCCTTTGAAGAG   | AAGAGCTCAGAAAGGCTCAG           | TGCTAAGTTCGGTGGTTCTG        |
| Spnb1     | TAGCCCTCCATCTGCACAGT   | ACCACAAAGACGAGCAGGAG   | CACCTGTTAGAGGCCCTTCTTG         | AGGCACGCTCCTCTCTCTGT        |
| Gm17618   | TTGCTTTCCTTCTACCTGATGA | TTGGAAAGGAGAGGCCAGAGA  | TTCTCTCACTTTTATTTGCTACTTTT     | GCACCTCTCTCAAATAATAGTTAGATG |
| Esm1      | TCCTTGTCTGACCCACTC     | TCCATGCCCTGAGACTGTACG  | CAGCTGGGAGACATGAAGAG           | CTCGTCACCAAAATCATCCTC       |
| Wapal     | TGGAACAAGATGCCCTCTCAG  | CCAAAACCAACCCAAAACCTA  | CATGATTCGGCTTTTGGAGT           | GCAAAGACTTAAAGGAAAGTTTTTATC |
| Ift57     | AAATCCCATGGTTTTCTAGGG  | ACCTCACTTAGCTGGGCTTG   | TTTGTGGATTGGGTTGAAGAG          | AAATCTGCAGAGCATTCTTAAAT     |
| Irf8      | ACCAGCAGTGTACGCCCTCTC  | GGACCTCATGACCCCACTCA   |                                |                             |
| Lyn       | AACTCTGAGTAGGAGCCCAACA | GGGAATCTTCCCATAGGTGAC  |                                | TCACAATGGAGTGGGGTGTGA       |
| Thr4      | TGCACATGAATGTGTCTTCA   | GAGATGGAGCGGCAGTTAAG   | TTTTTATTTTATACAAATGATGGTTTTCCA | TGGCAAAAGGACAGCAATTTT       |
