# Supplementary material for: Unlocking the Bottleneck in Forward Genetics Using Whole-Genome Sequencing and Identity by Descent to Isolate Causative Mutations
Source: PubMed Central journal article supplement (PMC3561070; doi:10.1371/journal.pgen.1003219), 2013-01-31
Supplement: pgen.1003219.s008.pdf [file pgen.1003219.s008.pdf]

| Chr   | Pos       | Ref SNP | Left (Forward) Primer         | Right (Reverse) Primer      | Type of mutation      | Sanger: |
|-------|-----------|---------|-------------------------------|-----------------------------|-----------------------|---------|
| chr10 | 79354457  | C       | GTGCTGCACACTGCATGG            | CGGGTGGGCACACTACTCT         | Coding Homozygous     | TP      |
| chr8  | 96929639  | A       | AAATAAACTGGAGAAATCTGAGGCT     | AGATGATTTTCCCTCTGGATTTTAC   | Coding Homozygous     | TP      |
| chr8  | 81880266  | A       | AGAGTTGGGGTAGCTGCTGT          | TCTTATTTGCTCTCTCGCTCTCTC    | Coding Homozygous     | TP      |
| chr10 | 94306815  | G       | GCAATGCATGGAAACTCACAT         | GACTGTGGAAACGCTGCAATA       | Splicing Heterozygous | TP      |
| chr10 | 77454832  | G       | CAGGAGCTACTGACCTCTTGGT        | AAGTGTAGGGCTCTGTCTCTATAAT   | Splicing Heterozygous | TP      |
| chr10 | 62480787  | T       | GTTTTGAAACCTCATAGGTACTGGA     | AATAGGAGGAAGAGGGGTATTAT     | Splicing Heterozygous | TP      |
| chr10 | 62532691  | T       | ATGAAGAAGTGGTGAACACTACTGT     | CCCTTCTAAGATGAAACAAAGGTT    | Non-coding Homozygous | TP      |
| chr8  | 79028363  | A       | TGAACAAGTAAAGGTTCTTTTTCT      | TATTGACCCCTGCAAGATATAGTGT   | Non-coding Homozygous | TP      |
| chr8  | 68170219  | A       | TGGTGACCAAACTGACAACA          | CGATGTGTGTGACAAGCAAA        | Non-coding Homozygous | TP      |
| chr10 | 62533295  | T       | TTCTACAACCTTGTCTCTTGACTTC     | CCTGGTGTGTACCCCTTTTTATCTAT  | Non-coding Homozygous | Unknown |
| chr10 | 74458031  | A       | CTCTCACCTCTCCCTCCAGAC         | TTTGCAAAAGTGTGCTCTGTTC      | Non-coding Homozygous | Unknown |
| chr8  | 73517737  | G       | ATTGGACACATTTATAATTCGAGGA     | ACTAATATGTCTACTCTGGCGCAAC   | Non-coding Homozygous | TP      |
| chr8  | 94762440  | A       | TATGACTTTCATCAGTGCAATTCCTA    | CTCTGTGACATCACTGACAATCTTT   | Non-coding Homozygous | TP      |
| chr8  | 75810400  | A       | TTGCTTGAGCATATAAGAAAGACCT     | CAGTGTACAGAAAACCCCTGTGGT    | Non-coding Homozygous | TP      |
| chr10 | 100282238 | C       | CAACAGACTGTGTTAATTTGTTTATATGA | AGAAAATGTAATCATTTGTCCTCAA   | Non-coding Homozygous | TP      |
| chr10 | 75736529  | A       | AAAGTAGATGCTTTTACCTTGTGGG     | GCCTATGTACTGAGATGAAACCTTG   | Non-coding Homozygous | Unknown |
| chr8  | 78014812  | A       | TAACTTATCAGTGTGGA ACTCCTT     | TGTCTCTGGGATACACTATTTTA     | Non-coding Homozygous | TP      |
| chr10 | 99465763  | C       | CCTGGACATTAAGAATGTAGACCT      | CAGGATCTTTCCACTCTCTATTTGA   | Non-coding Homozygous | TP      |
| chr11 | 53008786  | A       | CAGAGACCCACAGTCAAACATAG       | CCACAAGAATGCCAACGCTATAAAC   | Non-coding Homozygous | TP      |
| chr10 | 74458034  | A       | TGGCTGTGCTGCTGACTG            | GCAAAAAGTGTGCTCTGTTCG       | Non-coding Homozygous | TP      |
| chr8  | 87468436  | G       | CAGGCATGTTAAAAGTGTGTTAGTTA    | GTGTGTCTTGGTCTCTCGGAA       | Non-coding Homozygous | TP      |
| chr8  | 91439253  | A       | TGCTGCTGTGAGTTGTAATGTAAGT     | GACTCAGAGAAGACGAGAACAGC     | Non-coding Homozygous | TP      |
| chr8  | 96148228  | A       | GAGCTTTTATCCTGTAATAGCAACAT    | GCTTCTGATTTTTTATCCAACAAGA   | Non-coding Homozygous | TP      |
| chr8  | 77663410  | C       | CTCCCAAGTCCCAGGATTAAG         | GGAAGAGGAAGAAGAAGAAGAAGA    | Non-coding Homozygous | Unknown |
| chr8  | 96929639  | A       | AAATAAACTGGAGAAATCTGAGGCT     | AGATGATTTTCCCTCTGGATTTTAC   | Non-coding Homozygous | TP      |
| chr8  | 91637313  | A       | ACCTTTCTTAATTCAAAATCAGCTT     | AGCAAAGGAGAGATGTTAGATGTA    | Non-coding Homozygous | TP      |
| chr8  | 72409696  | A       | CTTGCTAGATGCGGTCCTAATTAAC     | GAGCTGTGCCCAGATGTAGTAG      | Non-coding Homozygous | TP      |
| chr10 | 75494347  | C       | ACAGGCAAGAAGGAAAAGAATGAG      | ATTCGAATTTTCAGTTTTTCAGTTTTG | Non-coding Homozygous | TP      |
| chr8  | 70491385  | A       | AAAAGGAAATACATCCGGTATAGG      | TGACTGTTTGTGCCATCTTTTACTTA  | Non-coding Homozygous | TP      |
| chr8  | 84771825  | A       | ATCCATGTGCAATTTAATCTCTGT      | AACACCTTTTGTCTTATTTTCACAG   | Non-coding Homozygous | TP      |
| chr10 | 74503812  | G       | TCTGTGCGAAAAGCTGGTAGA         | GGCCCCAAGCTCACAGTAAAC       | Non-coding Homozygous | TP      |
| chr5  | 64196341  | A       | ACGAAAGCATAGAGCAGTTATTCTG     | AGCCTTGCAATATACAGGTAAGGTA   | Coding Heterozygous   | TP      |
| chr4  | 123152578 | T       | GGATACAAACTGACCTTAAAGTTAATGA  | TCTGGAATCCCTCTGGTCAAT       | Coding Heterozygous   | TP      |
| chr8  | 112051551 | A       | GTCTCTTCTTTGACCTCCTCAGTT      | GCAGTCTATTTTGGATGTGCTTT     | Coding Heterozygous   | TP      |
| chr5  | 38711842  | T       | AGCCTGGGAGCATCCATC            | TGATGGGGTTGAGAGAGGAG        | Coding Heterozygous   | TP      |
| chr10 | 57929942  | C       | TATTTTGCAAAACCTAAGGCATTTTC    | GAATATTTGTTAGGATGTTGTTG     | Coding Heterozygous   | TP      |
| chr10 | 79354457  | C       | GTGCTGCACACTGCATGG            | CGGGTGAAGCCTACACTCT         | Coding Heterozygous   | TP      |
| chr10 | 121229763 | A       | GAGTCAAGGACTAACAATCTCAC       | AGACCTACAATTAAGGACAGCCAC    | Coding Heterozygous   | TP      |
| chr4  | 118399428 | G       | CTTTGCAATGAATCTTCTTACTGT      | CAGATCTTTAGAAATGGCTAATGAAGA | Coding Heterozygous   | TP      |

|       |           |   |   |                              |                            |                         |         |
|-------|-----------|---|---|------------------------------|----------------------------|-------------------------|---------|
| chr11 | 65831008  | A | G | TAGAGTTCATAFAFAFTTCCCTTGGGGC | TAGCTCTTCTCTCTCTCTTTCTCCC  | Coding Heterozygous     | TP      |
| chr4  | 102102720 | C | G | GTGCTAGGTTGGTGATTTACAAGG     | TAGTGTAGAAAGCAGTCTAAATGCC  | Coding Heterozygous     | TP      |
| chr4  | 147129703 | T | C | CTGATGAAGCTAAGATGAGATTTT     | CAGATCCATCTTAGTATCCATCAGG  | Coding Heterozygous     | Unknown |
| chr11 | 33969900  | T | C | CTCTGACTCTCTGTTGGTACTGAT     | AGCATTAAGATCAATGTAAAGCCAC  | Coding Heterozygous     | TP      |
| chr5  | 145582831 | A | T | AGTCCCTGAACTTCTTCTGCTAACTGTG | AAAATGTAACTAAGGACTACGGGCT  | Coding Heterozygous     | TP      |
| chr4  | 102915369 | T | A | TGGGCATATATTTTCCCTTGATGTTA   | CTGTTTAGACAGAAATACGCCAATC  | Coding Heterozygous     | TP      |
| chr5  | 77830595  | A | G | AACCAATTCCCAAACTAGGTAGACT    | TAATACAGTTCCCTCATGTTGTGGTG | Coding Heterozygous     | TP      |
| chr4  | 102102719 | G | A | GTGCTAGGTTGGTGATTTACAAGG     | TAGTGTAGAAAGCAGTCTAAATGCC  | Coding Heterozygous     | TP      |
| chr8  | 126957907 | G | T | GGTCTCGTCCCTCCCTCGAGTT       | GCTACGAGAGCCCTGACACATC     | Coding Heterozygous     | TP      |
| chr11 | 59598709  | T | C | ACATACTCGGTGCTCCATCATC       | TCTCTCTGTAATCTCAGTACCACCC  | Coding Heterozygous     | TP      |
| chr6  | 55013134  | G | A | AGATTTTGACTTGTGTTTTCCTTCC    | CTCCCTGAGAACTTACCTGTTC     | Coding Heterozygous     | TP      |
| chr6  | 83002774  | G | A | TGTAAGACAGGCTCACTTTTCTTTT    | TCCTGGTATACAGACACAGACAGAG  | Coding Heterozygous     | TP      |
| chr6  | 113434047 | G | C | GTGCTTGAGCCTGTTTCTGAG        | CTTACCCAAATGCCATACAGTTAAA  | Coding Heterozygous     | TP      |
| chr10 | 93596769  | T | C | ATAGAAAGCTACCGAAAGATGTG      | GAAATCACTTGTGCAATCATACAC   | Coding Heterozygous     | TP      |
| chr4  | 143401586 | A | G | GGAATGTAGGAAGATGAGAAATCAC    | TAACCAAAGCCACAGTCATAGAAAAT | Coding Heterozygous     | TP      |
| chr11 | 94967924  | G | T | AGCGTGTTAGAGGAAGAAGAGAG      | GCTCCTATCCTTTCCCTCTGTAG    | Non-Coding Heterozygous | TP      |
| chr2  | 43148044  | A | G | AAAAGTGTGGGTTTGGTGCT         | ACTTTAGCCTTAATGCTCAGAGAAG  | Non-Coding Heterozygous | TP      |
| chr4  | 119876618 | T | C | TATCACACTGGACTTTCCTCTTTT     | ATGACTGCTGTCCCTTGTTC       | Non-Coding Heterozygous | FP      |
| chr6  | 69167249  | A | T | TCTCTCTGACTCTCTCTCTCTCTGG    | GGATACCATGGGAAAFAPA AATGAA | Non-Coding Heterozygous | TP      |
| chr19 | 29483659  | A | T | GGAAACAAGAAAGAGCTTATGAGTG    | TTTTTCCACCTTATATGCAATTTTC  | Non-Coding Heterozygous | TP      |
| chr10 | 108727258 | T | A | ACACAATCTGCAAAATAGTCTTGG     | TCGTTTACAGAAACTAGTGTGTTGC  | Non-Coding Heterozygous | TP      |
| chr9  | 31588417  | T | G | GCATTTCCAAATCCTAGACTATG      | GTTTCTTTGGGTTACTGGTGTAGTT  | Non-Coding Heterozygous | TP      |
| chr10 | 65179218  | A | G | TAAGATTAGTTGGGCTTCTCTGTA     | AAATTCAGTAAATGTTGTTGGAAT   | Non-Coding Heterozygous | TP      |
| chr5  | 150645401 | C | T | ACCCTGAAGCTACTGAACATACATC    | CTGAAGACAGAACATCAGAAGTTGA  | Non-Coding Heterozygous | TP      |
| chr2  | 17426021  | A | T | ATTTAAATGTCTCAGATGCAGGAG     | GACTGCCCTTGTCTATTTATGAGGTG | Non-Coding Heterozygous | TP      |
| chr6  | 100774589 | A | G | AGTGAGAGACCTCGTCTCAAAG       | TTCTCAACTCTCAAAGGACATAAAC  | Non-Coding Heterozygous | TP      |
| chr4  | 145462750 | C | G | TCTTTCTCTCCCTTAAGTAGCTTCC    | CAAGCCTTTAGGATTTGCTTTAATC  | Non-Coding Heterozygous | FP      |
| chr2  | 28619987  | G | A | ACTAGCCCCATCTTCTAGAGTTT      | GAGGTAGACACAGGAGATCAGAAAT  | Non-Coding Heterozygous | TP      |
| chr6  | 72034052  | A | T | AAGAAGAAGAAGAAGAAGCAGC       | TCCCAAGATAGAGAGAGAGAGGTG   | Non-Coding Heterozygous | TP      |
| chr6  | 44456662  | A | G | TTCAGCCCATTATCCTTGGT         | TTCCCTTTCCCCACCTATCCT      | Non-Coding Heterozygous | TP      |
| chr2  | 31644666  | A | T | CATCTCCATAGTCTTTTAGAACCCA    | CTAGCTGCAAGAACAAAGGCTCT    | Non-Coding Heterozygous | TP      |
| chr10 | 113805663 | G | C | AAATCTCGTGGGGAAGGACT         | AAGCAAGCAAGCAAGGAAA        | Non-Coding Heterozygous | FP      |
| chr11 | 6605800   | C | T | TTTCTTAATAGACATGTCCTCGAC     | GAGGTGGACCTAATGATCAATGAC   | Non-Coding Heterozygous | FP      |
| chr19 | 39996078  | A | G | TGCACATACTAGTCTCAGCAGAATC    | GCAACAGTAGGTGAGAATGGTAATC  | Non-Coding Heterozygous | TP      |
| chr8  | 32391933  | A | T | AAATGCTAGTGTCTACTGTGTAAGG    | CCCCATGATCAACATTTGTAAGTA   | Non-Coding Heterozygous | TP      |
| chr6  | 100153871 | A | G | CTCCCTCAITTCATGCTGCTTAG      | GAGACCAGATTTAGAATGGAGACAAA | Non-Coding Heterozygous | TP      |
| chr11 | 28123635  | T | A | TCACTGTCTTTGTATTGAGTTAAGGAA  | TAAAACTGTGATTTCTGTGATCCTGT | Non-Coding Heterozygous | TP      |
| chr4  | 124138040 | C | G | GTGTGTGTGTGTGTGTGTGTGTA      | CACATACTCCTTCCATCATTTCTTT  | Non-Coding Heterozygous | Unknown |
| chr10 | 66292950  | G | A | AGGTAGGTAGGTAGGTAGGTAGGTAGA  | ATCTGTCTGTCTGTCTGTCTGTCTG  | Non-Coding Heterozygous | Unknown |
| chr10 | 67397252  | A | T | CACCTGTACATGCACATACATCTTA    | ACATCCAGGAAGTGTATGAATAAGC  | Non-Coding Heterozygous | TP      |
| chr8  | 3832950   | A | G | AAAGGACAGTCTTAAAGCCAGATACA   | AGGGGAGACTACATTTCCCTCTCTT  | Non-Coding Heterozygous | Unknown |

|       |           |   |   |                            |                            |            |              |    |
|-------|-----------|---|---|----------------------------|----------------------------|------------|--------------|----|
| chr11 | 20336828  | T | A | ATATTTCCAAATATCTTCTCGACC   | TGTTGATTGGTAGTATGAACAGGAA  | Non-Coding | Heterozygous | TP |
| chr11 | 5265846   | T | A | AAAGTTGCTTATGCCCAATTAAAG   | TGGGGTAAAGAACTAATCCTATGTGA | Non-Coding | Heterozygous | TP |
| chr4  | 124954916 | G | T | AGTTCCTGGTACTTTTTGGAGAGAT  | CTCAACACAAAGCAACTTAAGAGAGG | Non-Coding | Heterozygous | TP |
| chr2  | 12336455  | A | G | CACATTAAGACAATCAAAATGTCAGG | GGCTAACTTGGTGTATTATTACATGG | Non-Coding | Heterozygous | TP |
