# Supplementary material for: Unlocking the Bottleneck in Forward Genetics Using Whole-Genome Sequencing and Identity by Descent to Isolate Causative Mutations
Source: PubMed Central journal article supplement (PMC3561070; doi:10.1371/journal.pgen.1003219), 2013-01-31
Supplement: pgen.1003219.s009.pdf [file pgen.1003219.s009.pdf]

| Chr   | Pos       | Ref SNP | Left (Forward) Primer       | Right (Reverse) Primer      | Mouse1 | Mouse2 | Mouse3 | Sanger: |
|-------|-----------|---------|-----------------------------|-----------------------------|--------|--------|--------|---------|
| chr10 | 51889817  | A       | TGAAAGCTTTGAATAATTTAAGGACAA | GAATAGTGAAGTGAATGCTGTTTCC   | 1/1    | 0/1    | 0/1    | TP      |
| chr1  | 46261086  | A       | ATGAAATACAGTGAATAACATGAGCA  | CACACTGTAGGAGTGTGACACAT     | 1/0    | 1/1    | 1/1    | FP      |
| chr11 | 72731358  | T       | GATGTTGCTGAAGAAAGGTTGTA     | TACCTTTATGACCTTTGAATGAAGC   | 1/0    | 1/0    | 1/1    | TP      |
| chrX  | 3907117   | G       | TCAGAATCTGTAGTAGAGAAACCCA   | GAGGTCCATGAACATTAGAACTTGT   | 1/1    | 1/1    | 0/1    | FP      |
| chr11 | 101187980 | T       | CTATATCAACACAGCCTTCATGAGT   | CTTTCTGAGCTCACTCCTTGAATTT   | 0/1    | 0/1    | 0/1    | TP      |
| chr7  | 149044528 | T       | ACTCCTCTCAGCTCAGCTCAGT      | GACAAAGAAAGCCTTTGAGGTT      | 0/1    | 0/1    | 0/1    | TP      |
| chr12 | 114018097 | C       | ATCTTTGAGCTGGGCATCT         | CTGAAGACCCCTGACCTGAG        | 1/0    | 0/0    | 1/0    | TP      |
| chr14 | 43347611  | G       | CTTGGTCTGGTCTGTGTGTTATT     | GAGAACCTTAGAATCTTCTGTGATG   | 1/1    | 1/1    | 1/1    | FP      |
| chr2  | 145747631 | A       | ATACATTCAACTTGGGATCTCAAC    | AAAGGATACATAGAAGCTGGAACCTGC | 0/0    | 1/0    | 1/1    | TP      |
| chr2  | 82823507  | G       | AAAAAGTAAACGATTCACAGAAGA    | AAAGGAAATTTGCCCTTGACATAAAA  | 0/1    | 1/1    | 1/1    | Unknown |
| chr5  | 139048775 | A       | ATACTGCTTTTGTGTTGAAGGATTT   | GTTTATCTGTGGAAGGACGTGTAT    | 0/0    | 0/1    | 1/1    | TP      |
| chr11 | 68628466  | G       | GTTGGAGAGTGAAGCCTTGTTTAGA   | TTGACATCACTGGTCTTACTTTCTG   | 0/1    | 0/1    | ./.    | Unknown |
| chr4  | 137104386 | C       | AATATGTGTGCAGCCTTCTGAG      | CAGGTCTCAAAGAGCTTTTCTTCT    | 0/1    | 1/1    | 1/1    | TP      |
| chr14 | 66378562  | A       | GTGACATGGATTTCAACAATGATTC   | GTACCTTACCTCACCATCCTTACCT   | 0/0    | 0/0    | 1/1    | FP      |
| chr6  | 126688537 | G       | GATGTGGAGTCGGAAAGGTAGC      | ATGAOCCACGGTAGGTTATGGG      | 0/0    | 0/1    | 1/1    | TP      |
| chr11 | 70028825  | C       | AGAAGAGGGGCTAAAGAATGTTTG    | AAAGTATCAAGGAGGAACTGCAAG    | 0/1    | 0/1    | 1/1    | TP      |
| chr6  | 32135423  | A       | TCATTATCAATGAGCTCAGCCAGTAG  | AAAGTGTTCCTGCTCTCTTTTCAT    | 0/1    | 0/0    | 0/1    | FP      |
| chr1  | 53549974  | T       | ATCTGGTGTAAATCTGATAGCCTTG   | GAATGAAGATTTTCAACTCAAAGGA   | 1/1    | 1/1    | 1/1    | FP      |
| chr2  | 83262425  | A       | AACTGTGAAAGTCTTGTGTTAGGTG   | ATCTCAGAGAATAGAATGTGAAGCC   | 0/0    | 1/1    | 1/1    | FP      |
| chr9  | 21356924  | T       | AGTCTGTAAGCTGAGGTAAAAGAAAT  | AGTTCAAAAAGCTACTCTATGGCAA   | 1/1    | 1/0    | 1/0    | FP      |
| chr4  | 43597914  | C       | AAAAAGCACCCCAAGATAAACTTC    | CTCCTCCAGAGTCAGCAGAAAT      | 1/1    | 1/1    | 1/0    | FP      |
| chr4  | 3182839   | T       | TATTTGGCTCATAAATATTGCTGTGA  | TCCTCTCGAGGACTTTTGAAGTTATTA | 1/0    | 1/0    | 1/0    | Unknown |
| chr5  | 87716559  | C       | CAGCTATCATTCACCTTCAATCAGAA  | GGCCTGGTTGTTAATGGTAGATAAT   | 0/0    | 0/0    | 1/0    | FP      |
| chr1  | 4329977   | G       | GAAAATTTCTTGAATAGAACAGCAA   | CATTTGATTTTGTGATTTTCTGGAGT  | 0/0    | 0/0    | 1/1    | FP      |
| chr10 | 3042685   | T       | TTGTATTTACAACATATAGCCAGGTG  | CACACACACAGAGAGAGAGAGAG     | 0/1    | 0/0    | 0/1    | FP      |
| chr2  | 94795429  | A       | AAACAGGTTTTTTCAGAGTTGATGAC  | TGAAGTTATAATCATTCACAGGGGT   | 0/0    | 1/1    | 1/1    | FP      |
| chr3  | 82193049  | C       | GGATAGTACCATGACTTATGTCCCA   | ACAGAAAACGTGGATTAAGTACAGG   | 0/0    | 1/0    | 1/0    | TP      |
| chr3  | 91370835  | A       | ATAGCTGACTGTGAGCATCCACTAC   | CATGGAAGGAGTTAAAGAGACAAAA   | 0/0    | 0/0    | 0/1    | FP      |
| chr4  | 89184839  | A       | AGAATGGTTTTCCAAAGCTACAAGAT  | TGTTCAAAACATATCCAGTAGGCAA   | 1/0    | 1/1    | 1/0    | TP      |
| chr2  | 165946667 | G       | GGTGGAGTACTAAGCATTGGAAAAG   | ACAATCTCACATGCTAGATCAACAA   | 0/0    | 0/0    | 1/0    | FP      |
| chr6  | 136724323 | A       | TAAAATGTCAAGAAAACAACATCTG   | AGCTTACAACCTCTCGGAAAACCTCC  | 0/0    | 1/0    | 1/1    | TP      |
| chr14 | 66527259  | C       | AGGGACGAAATACATCTTCTTAGGAT  | AAAGAAAAGAGCTGAATGTTGAGAA   | 0/0    | 0/0    | 1/1    | FP      |
| chr16 | 18592638  | T       | CTCTCCTCTCCTCTCCTCTCCT      | AGGATCTCTGCATTTGAAAAGTTAG   | 1/1    | ./.    | ./.    | Unknown |
| chr5  | 143163864 | A       | GCTGTAATTTTGTCTCCTGTTATGAT  | CTTTCAATGTGCAAGAGGTTGAAG    | 0/0    | 1/0    | 1/1    | Unknown |
| chr1  | 13025454  | A       | TCAGAAAATGAAAAGGGAAACAATAAA | TCAAAATAGCAAAACCTTTTGAAG    | 0/1    | 0/1    | 0/1    | TP      |
| chr1  | 6170534   | G       | CACCTGAGATCATTTGAAAACATA    | TCTTTTACCTTTCTCGAAGCTTCG    | 0/0    | ./.    | 1/1    | TP      |
| chr3  | 74125312  | G       | GAGTGTGGCTTAGTCTCTATAACAA   | TGGAAAATGAACCAAAAATAGTCTCT  | 0/0    | 0/1    | 1/1    | TP      |
| chr11 | 99020131  | A       | CCGAAATCTTTCTCTCTACATTTTC   | GTCCAAACACTAAAAGATCCTTGTCC  | 0/1    | 0/1    | 0/1    | TP      |
| chr3  | 83183859  | C       | GAGTTACAGAGACAAAATTTGGAGC   | CTCCTTTGGGTACTTTTCTCTAGCTCT | 0/0    | 1/0    | 0/0    | FP      |

|       |           |   |   |                            |                             |     |     |     |         |
|-------|-----------|---|---|----------------------------|-----------------------------|-----|-----|-----|---------|
| chr2  | 102124138 | A | G | CCCTAGCCCCATTTTATTATGTTAT  | TAAAGCATGAACGTAAACAACTGAAA  | 0/0 | 1/1 | 1/1 | TP      |
| chr6  | 33734748  | A | T | ATAAAGTAGAAAGAGTGCCTTG     | GGACTTCACTGGAGACATTTTACAT   | 1/1 | 0/0 | 1/1 | TP      |
| chr17 | 84861317  | G | A | ACACACACACTTACTGCCCTAGTCT  | ACTAGACAGTAAGTGTGTGTGG      | 1/1 | ./. | 1/1 | Unknown |
| chr16 | 63177786  | A | G | CACCTCGTGAAACAACATACAATAG  | GTAGAAGAGAAAAGAAAGACCTGGTT  | 0/0 | 0/1 | 0/1 | TP      |
| chr10 | 53641804  | T | A | CATTTCTCATTTAATGCAACTGAACA | CATAGTTTATTTAGGAGGCAGCAA    | 1/1 | 0/1 | 0/1 | TP      |
| chr6  | 60489599  | G | T | GAATCTCACTTAGAAGGGGAATAA   | TCACTCCTATTGATTTCTAGATGCC   | 0/1 | 0/1 | 0/1 | TP      |
| chr3  | 59781263  | A | G | GACTTACACACACACACACAAAA    | GACTAAGACATTTGGGAAAACCTGAGA | 0/0 | 1/0 | 1/1 | TP      |
| chr11 | 78281164  | T | A | AAAAAGCTAAAATTTCTGCTGC     | GTGTCACTACCGAGTTAGCTGAGTT   | 0/0 | 1/0 | 1/1 | TP      |
| chr6  | 122418894 | A | T | TGGATGTCTCTATTTACGAGATGG   | AGGTATCTTTACCTTTGTGCTTTG    | 0/0 | 1/0 | 1/1 | TP      |
| chr11 | 81178333  | C | A | AGTTTTAGCAAAGTAAAGTTGGAGA  | TAAGTGGATATCCTTACCCACCTGTC  | 0/1 | 0/1 | 1/1 | TP      |
| chr6  | 133915812 | T | A | TGTATTTGGTTTTTATGTGAGGTTCT | TAGACATAGCCATTTTACCAAAAGTC  | 0/0 | 1/0 | 1/1 | TP      |
| chr6  | 38167512  | A | T | CTCCCCAGTTCAGAGACTAGTTAAT  | AGACTCGCTCATCTTACTGACCTAA   | 1/0 | 1/0 | 1/0 | TP      |
| chr17 | 38389993  | T | C | TTTTTTCTCAGCCTGTTTATCAAT   | CTCTCTCTCTCTCTCTCTCTCCC     | 0/0 | 1/0 | 1/0 | Unknown |
| chr2  | 115767708 | T | A | CTTTTCTCGCTGAAGTCACTAAAG   | GGAGAGAAAAGTGCAACTCATTTTTA  | 0/0 | 1/1 | 1/1 | TP      |
| chr6  | 34942306  | A | G | ATTCAGCTGTATACATTTTGTAGGC  | CGTTCTTAACTTTCACAGTCAATG    | 1/0 | 0/0 | 1/0 | FP      |
| chr3  | 56214691  | A | G | AAACCTTTAGTGTAGATGTAGGCCA  | ATCAAAACAACCTTGTAGTGGCAAGTC | 0/1 | ./. | 0/1 | FP      |
| chrX  | 84319042  | T | C | CTCTTTGATGATTTGTTTTTGCTTT  | TCTTTAATCTCATCACTCAGAAAGGC  | ./. | 1/1 | 1/1 | Unknown |
| chr2  | 82823507  | G | T | AAAAAGTAAACGATTCACAGAAGA   | AAAGGAATTTGCTTTGACATAAAA    | 0/1 | 1/1 | 1/1 | FP      |
| chr2  | 25471530  | G | A | CAACAGACTTACACTGACGCTCTT   | GGACTCAGCCAAAATAGGCTTC      | 1/0 | 1/1 | 1/0 | TP      |
| chr10 | 59791020  | T | C | TTATATTTAGGGAATGGAGGGAAG   | ATACATTTACAGAAAAGTCTGAAGG   | 1/1 | 1/1 | 1/1 | TP      |
| chr14 | 44082649  | G | A | GAACTGGAATAGATCTCGTTGAA    | GGCTATACTCAAAAACAACTGGAAAA  | 1/0 | 1/0 | 0/0 | FP      |
| chr5  | 144295535 | A | T | TATTTATTTTAAATTTAGCCGGGCA  | CTAGGCTCCCAACTCACTATGTA     | 0/0 | 0/1 | 1/1 | TP      |
| chr4  | 137271581 | C | A | CATGTAATAGACCAGGACAGACAG   | AATAGTAATTTGAAGTCTCCTGTGG   | 1/1 | 1/0 | 1/0 | TP      |
| chrX  | 4767755   | G | C | AGTGACCTGTGAGTAAAAGCC      | GCATCTCTATTCACACTGACAACAC   | 1/1 | ./. | 1/1 | Unknown |
| chr12 | 118561783 | A | G | GTTTTCTTACCACCTTCTCAGACTCA | AGAAGTTCTCAGTTGTGCCCTCTCT   | 1/1 | 1/0 | ./. | Unknown |
| chrX  | 3918573   | T | G | ACTACTTTACCTTTGTGCCACTATGC | CAGGAAAATCTCAACAGAACTCAAT   | 1/0 | 1/0 | 1/0 | TP      |
| chr6  | 142116493 | T | A | TGTGCTTTCATGTTGCTACTTTTAT  | AAATGAAAAGATTTCTCGAAATCCC   | 1/1 | 0/1 | 1/1 | Unknown |
| chr4  | 105692962 | A | T | TTTTGGGCTCCAATAATAAGTAAG   | CTGGTCCACTTTGCTTTATCATTAGT  | 1/0 | 1/1 | 1/0 | TP      |
| chr19 | 43900761  | T | A | GAGCTCAGTTGTCAGTATGAGTCAG  | CTGACATCCTCACACAGACATAACAT  | 1/1 | 1/1 | 1/0 | TP      |
| chr17 | 30176494  | A | G | TTTGAAGATCATGGATGCATAGTAA  | AAAAGGAGATTTACAGACGAGTTTCA  | 0/0 | 1/0 | 1/0 | TP      |
| chr3  | 60540665  | A | G | GTAATTTGATGCATATTTCTTGCCC  | ATGACTACTTTGTGGGAATCACTTGT  | 0/0 | 0/1 | 1/1 | Unknown |
| chr14 | 81758650  | A | G | TTCTCAACAATAAAGAACTCTGG    | AGACAGGTTTCTCTGTGTAGTCCCT   | 0/0 | 0/0 | 1/0 | Unknown |
| chrX  | 124413795 | T | C | ACAGTGAACAATAATGAGCCAAAG   | ATCTTCTCTGAGACTCTGCTACCTG   | 1/1 | 1/1 | ./. | Unknown |
| chr1  | 54858008  | A | T | TGTTCATTAAGATTTGTGACAGTGA  | AGTAAAGGCTGTTGGATATACTGTG   | 0/0 | 1/0 | 1/1 | TP      |
| chr17 | 84843952  | A | T | TGGTTAGAAGCTGCCTAGTAAAAGA  | CAGTTTGGCCTTATTTGTAATTTTG   | ./. | 1/1 | 1/1 | TP      |
| chr3  | 65616079  | T | C | ACTTGCTTTTCTCCTTTTACCATT   | CAGGAGTCAAAACCAATCATTTCTAT  | 0/0 | 0/1 | 1/1 | TP      |
| chr2  | 118251979 | A | G | CAGCATCTGATTTATCTTTTGGGA   | AAAAGAAAAAGAAAAACCAACAACA   | 0/1 | 1/1 | 1/1 | TP      |
| chr12 | 5066118   | C | T | GAGTCTTTGGTAGCCTGGTATC     | AAGCAAGGCTACCAAAAGTACTCC    | 0/1 | 0/1 | 0/1 | Unknown |
| chr14 | 7559653   | T | C | TGAAGAATATGTTTCTCTTAAAGGC  | CTTCTCTCACATGGTGTCTATCT     | 1/1 | 1/1 | ./. | TP      |
| chr11 | 107967175 | G | A | CCAGACCTCACTTTTCTTTTCAATTA | GGACACCTGTCTCTCTGGTCC       | 1/1 | 1/1 | 1/1 | Unknown |
| chr6  | 138241120 | A | T | GAGAGAGAGAGAAAAGAAAGGAAGA  | TCTTTTCTTTCTTTCTTCTTCTCTCC  | 0/0 | 0/0 | 1/1 | Unknown |

|      |           |   |   |                            |                             |     |     |     |    |
|------|-----------|---|---|----------------------------|-----------------------------|-----|-----|-----|----|
| chr5 | 92151731  | A | T | GTCCTGAAACTGTGGTAAAGTTAGAA | CATGCTTTACACAGCTTTGACTCTA   | 0/0 | 0/0 | 1/0 | FP |
| chr5 | 101596050 | A | C | TATGTCACAGCAATGAATAAAGCAT  | TGAACCTATCTTTTAAAGCCCTTTTCT | 0/0 | 0/0 | 1/1 | FP |
| chr5 | 146494346 | A | C | GAAGAATTGAGTTGGAATTTTGATG  | CACAAATAATACAAAAGACCTTGGC   | 1/0 | 1/0 | 1/0 | TP |
| chrX | 4260792   | T | G | AATCACAGGAGACAGAGATAAGCAG  | ACATTATCACCCAGCTTTCTGTTTTTC | 1/1 | 1/0 | 1/1 | TP |
| chr4 | 105057916 | A | G | TGAGGCTGAAATCTTATCCCTTTCTA | TTTGTAGGGTTGAGCAAAAATAATG   | 1/0 | 1/1 | 1/0 | TP |
| chr3 | 72456852  | T | C | GGTACTTTCTCTAGCTCCTCCATTG  | TGCATCAAATTTGGATAACATCAATA  | 0/0 | 0/0 | 1/1 | TP |
